# Supplementary material for: Differences between motor execution and motor imagery of grasping movements in the motor cortical excitatory circuit
Source: PeerJ. 2018 Aug 28;6:e5588. doi: 10.7717/peerj.5588 (PMC6118197; doi:10.7717/peerj.5588)
Supplement: Supplemental Information 1 [file peerj-06-5588-s001.xlsx]

## Sheet: behavior data
	motor execution durations(ms)	motor imagery durations(ms)	MIQ scores		age
			kinesthetic items	visual items
sub1	1276	2113.97	10	9	24
sub2	1114.5	1387.2	9	8	22
sub3	1132.22	1265.5	6	5	26
sub4	1370	1327.74	11	4	22
sub5	1222.41	1985.27	6	6	22
sub6	1401	1956.3	13	11	20
sub7	1748	2801.27	5	4	28
sub8	1711.47	2300	11	11	20
sub9	1245.33	2165	11	11	18
sub10	1319.67	1858.8	7	8	19

## Sheet: sub1
intracortical excitatory							intracortical inhibitory
motor imagery			motor execution				motor imagery			motor execution
APB	FDI		APB	FDI			APB	FDI		APB	FDI
Baseline	Baseline		Baseline	Baseline			Baseline	Baseline		Baseline	Baseline
0.596008	0.460968		1.586	2.24091			0.895691	1.16379		1.55121	1.31638
0.849152	1.2471		1.43356	2.85111			1.18927	1.08826		0.390778	2.11212
1.36978	0.894928		2.28012	1.61285			0.621033	0.313873		0.706329	0.579834
0.858612	1.59042		1.11969	0.930481			1.64047	1.66336
1.24176	0.850525		0.472565	1.53275			0.570831	0.498657		0.140686	0.404968
0.73822	0.944824		0.511627	1.15585			1.06018	0.448151		0.189056	0.350647
2.26379	1.11832		0.388184	1.63437			0.307617	0.654449		0.202789	0.454865
0.608215	0.766907		0.608978	1.39053			1.80588	1.96304		0.205383	0.321808
1.22757	1.24985		0.602112	1.16241			1.49399	1.97754		0.21698	0.499573
2.62329	0.782928		1.40884	2.14935			1.17538	2.18231		0.668488	0.478058
T0	T0		T0	T0
2.17438	2.79526		1.46011	3.72162			T0	T0		T0	T0
1.49673	1.17889		0.547791	2.01965			0.893402	1.61972		0.901184	1.79657
2.86575	1.52252		1.70593	2.05414			1.90949	1.90399		1.07147	1.52878
1.22543	1.81259		0.754395	1.0553			2.03491	1.95053		0.330048	0.397186
1.26785	0.921936		1.73279	2.491			1.47705	1.29196		0.263214	1.88019
0.463104	0.955811		0.388641	1.80435			1.46378	0.77713		0.281982	0.434875
0.688782	1.8457		2.26288	2.96936			1.9101	2.20352
0.716248	1.06308		1.08841	2.01187			1.52069	2.49649		0.971985	1.27228
1.21918	1.53015		0.702972	1.09772			0.837402	0.745087		1.11816	1.3417
1.47659	1.58722						0.493011	1.64719		0.245972	1.58173
2.09915	1.08505						0.472565	0.909119		0.932312	1.96228
2.86392	1.62964
1.47598	1.34689
1.30539	1.62125
1.24023	1.41983
							T20	T20		T20	T20
							1.50421	1.9368		1.97876	2.19925
							1.12289	0.861053		0.408783
T20	T20		T20	T20			0.795135	0.534668		0.529327	0.918884
1.8132	0.762482		1.63864	1.72409			1.44562	0.571899		1.08048	2.39059
1.13647	1.6391		1.56876	1.16608			1.01959	0.19043		1.60187	1.46561
1.81351	0.755768		1.08337	1.34308			1.54526	1.56448
1.58722	2.13821		1.60522	1.15372			1.42349	2.07489		2.19925	1.81473
1.30554	1.32904		0.899811	1.01227			0.474854	0.597382		0.981445	2.01706
1.36231	3.1015		2.04361	1.20606			0.790405	1.14426		1.84769	2.04956
0.579681			2.39609	1.6214			0.769348	1.2326		2.08664	1.63254
1.41998	2.61978		3.4552	1.63361
2.258	2.70966		2.83127	1.68823
2.06253	2.3233		1.28876	1.64902
							T40	T40		T40	T40
							0.794983	0.432739		0.302277	0.384369
T40	T40		T40	T40			0.350189	0.186462		0.88974	0.46463
2.33429	1.67816		1.50101	2.11868			0.430298	0.070953		0.427094	0.808105
1.66748	1.71722		1.29837	2.03613			0.738678	0.063477		0.289154	0.505066
1.32156	1.46256		1.38046	1.28677			0.713196	0.178528		2.65427	0.987854
0.913239	1.47537		0.568848	3.35144			0.342407	0.412445		1.66489	0.670319
1.12534	1.01532		2.28149	2.49573			0.192413	0.329132		2.76077	1.38382
1.83472	1.12595		1.81625	2.03018			0.252533	0.049591		1.76834	1.10336
2.59949	1.89133		1.92261	1.41281			0.45105	0.484161		1.44501	0.652924
0.727539	1.45187		1.70349	1.5332			0.487366	0.513		0.285492	0.542755
1.62445	1.87058		3.96072	2.24213
0.650482	1.19202		2.11792	1.60355

## Sheet: sub2
intracortical excitatory							intracortical inhibitory
motor imagery			motor execution				motor imagery			motor execution
APB	FDI		APB	FDI			APB	FDI		APB	FDI
Baseline	Baseline		Baseline	Baseline			Baseline	Baseline		Baseline	Baseline
0.240631	2.14203		0.706787	2.23297			0.164032	0.830688		0.886993	0.81131
0.392761	2.45316		2.71195	2.5914			0.256958	1.1087		0.479889	1.11084
0.277252	1.147		1.02615	2.05963			0.250092	2.33307		0.311279	1.55167
1.62705	1.58768		0.695038	2.52182			0.388794	0.95932		0.471649	1.17401
0.27298	3.33633		0.192871	2.03659			1.64291	0.631714		0.483093	1.1348
3.2695	3.1102		0.762177	2.45483			0.320282	3.12241		0.219421	2.16965
2.4173	1.32324		0.426483	1.99768			0.502777	0.902252		0.505829	1.31653
1.50024	2.02866		2.38724	2.27676			2.62772	1.05042		1.04996	1.16348
0.381775	2.5528		1.26388	2.32986			1.44196	1.4267		0.513763	0.805664
2.4646	2.03995		1.2381	2.10998			0.09903	0.761871		1.36414	1.28372
T0	T0		T0	T0
0.160065	1.10413		1.5036	2.75314			T0	T0		T0	T0
0.291138	1.08475		1.89011	2.71408			0.676117	1.9075		1.74698	1.03073
0.534668	3.38165		0.657959	3.55514			0.495911	2.15317		0.288086	0.406799
2.83142	2.31293		0.887451	1.75217			0.602417	1.19415		0.127258	0.797119
2.42325	2.36664		1.47461	1.8515			0.247955	0.92514		0.209198	0.424347
2.60956	2.13684		2.09946	2.41638			0.184631	1.03424		1.17142	1.00525
0.886993	1.33209		2.2113	3.59955			0.11673	0.653229		0.197601	0.928192
3.09296	1.9519		2.35153	2.20764			1.08246	2.29446		1.70715	0.966492
2.83691	2.59567		2.43546	3.05801			1.43082	2.30743		0.432434	0.752869
4.46777	1.9722		2.25388	3.84079			0.137482	0.758362		0.794373	0.782013
2.49252	1.35071						4.75998	1.15555		0.495605	0.931396
2.7832	1.81595
1.32858	1.88248
2.31659	1.69144		T20	T20
			1.8895	1.71127
			2.11349	1.66214			T20	T20		T20	T20
			0.827484	1.75873			0.207214	0.936279		0.134735	2.6503
T20	T20		1.0611	2.53571			0.276947	0.535736		2.31827	0.362549
1.07849	1.98364		1.44791	0.925446			2.85339	0.797577		0.727844	1.62567
0.295868	1.6687		3.27988	1.55762			0.16922	0.92865		1.00845	1.75064
0.93811	1.11618		2.31857	1.74789			0.245514	1.79886		1.22971	1.83609
0.296021	1.90811		1.59073	1.96365			1.06918	1.11298		0.539246	1.88858
0.210571	1.62857		2.06268	1.98456			0.433197	1.71387		0.22934	3.45398
0.709839	1.81808		2.01508	2.12174			0.153198	0.653839		2.02896	1.9603
1.68533	2.04575						0.667267	1.1261		0.71579	1.12717
1.33514	2.77985						0.470886	0.461426		0.182343	2.13257
1.3356	2.02896
1.66122	0.949402		T40	T40
2.01157	2.88803		0.292664	2.05856
0.382233	2.16339		0.419769	2.621
1.78253	1.922		0.768433	2.21207			T40	T40		T40	T40
0.30304	2.47376		0.839996	2.44492			0.066833	0.624695		1.76865	0.46936
1.67999	1.97632		2.18613	1.63452			0.381317	1.11526		0.143738	1.77551
			1.20102	2.04483			0.373077	2.01767		0.144806	1.18652
			4.09302	2.62146			0.512848	0.94986		0.844116	1.16348
			2.17071	3.19153			0.1091	0.648956		0.21637	2.59796
T40	T40		0.774231	3.40698			0.635071	0.954437		0.58197	0.880737
1.7215	1.24176		1.63818	2.50351			0.241699	1.12793		0.253143	0.777435
0.987091	2.52716						0.461426	1.78986		0.098419	0.775604
0.613861	2.47467						0.474548	1.00693		0.206451	0.52887
1.27304	2.6033						0.542908	0.872192		0.081024	1.1142
0.59906	3.56857
1.57715	2.86636
1.9339	3.75992
1.67404	3.03803
0.47699	2.07169
0.305176	3.36105

## Sheet: sub3
intracortical excitatory							intracortical inhibitory
motor imagery			motor execution				motor imagery			motor execution
APB	FDI		APB	FDI			APB	FDI		APB	FDI
Baseline	Baseline		Baseline	Baseline			Baseline	Baseline		Baseline	Baseline
0.236816	0.68634			0.587158			1.73279	0.312347		2.68341	1.05377
1.05728	0.710754		1.25412	1.89606			0.810852	0.290222		1.24558	1.34048
1.45416	0.83786		1.39893	0.671387			1.74667	0.26886		0.616455	0.60791
2.11151	0.564423		1.58539	1.02814			0.082092	0.061493		0.195313	0.343323
0.265808	0.303345		0.737762	1.36368			0.176392	0.067749		0.075989	0.448151
0.16922	0.287323		0.955658	1.21994			0.379639	0.123291		0.422821	0.526276
0.182037	0.246735			1.16776			0.256805	0.083466		0.100098	0.322876
0.352936	0.717468		0.308228	0.452728			0.131226	0.065308		0.523682	0.268555
1.09329	0.397797		0.563507	0.482178			0.082245	0.120544		1.2944	0.273285
0.626221	0.484161		2.01935	1.17981			0.309906	0.071869		1.00174	0.298767
T0	T0		T0	T0
1.84952	1.21628		3.39691	1.27853			T0	T0		T0	T0
1.18744	0.299835		1.35178	0.17334			0.148621	0.056763		0.696411	0.354462
1.10031	0.126953		2.5	0.291901			0.25238	0.062408		0.946198	0.057373
1.07941	0.2005		1.48361	0.371857			0.075073	0.064087		0.057983	0.098572
0.200806	0.926819		0.74295	0.286865			0.291901	0.233459		0.015259	0.064392
0.295563	0.201721		5.00198	0.307312			0.908508	0.180511		0.018768	0.069733
0.308838	0.634918		2.74506	0.19928			0.018921	0.081787		0.02182	0.072937
0.372009	1.04401		1.27502	0.261688			0.110474	0.067291		0.06897	0.111237
0.769653	0.857544		0.101166	0.128021			0.301819	0.091858		0.039215	0.106506
1.78009	0.442963		1.75415	0.201263			0.13031	0.069427		0.760803	0.037689
							0.178986	0.466919		0.137482	0.062103
T20	T20		T20	T20
0.601501	0.25116		0.194244	0.786591
1.12472	0.274811		0.466614	0.262299			T20	T20		T20	T20
2.32925	0.148315		2.20612	0.369263			0.213928	0.079803		0.4422	0.227966
0.166931	0.225983		1.23276	0.152588			0.207825	0.085144		2.70248	0.042877
0.157623	0.158997		1.2619	0.47348			0.795593	0.227661		2.11945	0.022125
1.81427	0.373688		2.4823	1.0672			0.321503	0.181885		0.29892	0.021515
2.35077	0.206299		0.508728	0.804901			0.119324	0.70282		0.794525	0.03006
2.53647	0.353851		2.043	0.138855			0.089264	0.296783		0.585938	0.037537
0.623932	0.314026		1.99173	0.38147			0.120239	0.396118		0.30014	0.098572
0.3125	0.601654		5.4863	1.43097			0.576935	0.547333		1.74759	0.069885
2.6358	0.57724						0.027008	0.177307		0.387878	0.057373
0.359497	0.712585						0.841217	0.147247		0.178223	0.066223
T40	T40		T40	T40
3.13263	0.676727		0.710907	0.207825			T40	T40		T40	T40
2.63992	0.770569		0.640411	0.24826			0.262756	0.383453		0.012207	0.010834
0.852203	0.508118		0.333405	0.426941			0.195007	0.478973		0.189972	0.042419
0.75882	0.639038		0.932007	0.128174			0.126648	0.301056		0.030212	0.056763
1.92368	0.492249		0.47699	0.256653			0.06424	0.328522		0.495148	0.083466
0.127869	0.253143		0.221405	0.509796			1.30371	0.247192		0.23468	0.215607
1.14609	0.623627		0.436859	0.253143			0.512543	0.113525		0.175629	0.148926
0.375366	0.167847		0.212402	0.046234			0.363464	0.258789		0.03479	0.077667
2.95608	0.916901		0.85083	0.163574			0.756683	0.146179		0.052032	0.084229
0.989838	1.29623		0.71106	0.377808			0.975342	0.274048		0.035095	0.039978
							2.30713	0.414734		0.346222	0.036011

## Sheet: sub4
intracortical excitatory							intracortical inhibitory
motor imagery			motor execution				motor imagery			motor execution
APB	FDI		APB	FDI			APB	FDI		APB	FDI
Baseline	Baseline		Baseline	Baseline			Baseline	Baseline		Baseline	Baseline
1.3205	0.895844		1.12732	1.98486			0.266876	0.811157		0.897827	0.19043
0.342712	0.262756		1.27564	0.59021			1.67313	0.256348		0.227356	0.219116
1.34994	1.79489		1.66962	0.431671			0.561066	0.235443		0.258331	0.34668
0.321503	0.203094		0.58548	0.260162			0.096893	0.255127		0.596008	0.836487
0.94635	0.358734		0.363922	0.261078			0.301208	0.161743		0.733337	0.223541
0.257111	0.291901		0.744171	0.439758			0.194397	0.271454		0.102997	0.345917
3.25165	0.519714		0.28183	0.174103			0.046082	0.217896		0.100555	0.183258
1.01013	0.462799		1.37909	0.337067			0.41687	0.332031		0.388489	0.186615
2.86636	0.501099		1.62476	0.634766			0.458221	0.192719		0.695801	0.256195
3.62076	0.527649		0.417328	0.295868			1.36078	0.541992		0.189209	0.203857
T0	T0		T0	T0
1.2767	0.967102		4.5694	1.45752			T0	T0		T0	T0
1.22391	0.496063		1.40671	1.10291			0.745544	0.444183		0.62912	0.393677
1.53015	0.967407		1.35452	0.413818			0.699615	0.491638		0.636292	0.207214
1.1673	0.488129		2.27127	0.873718			0.703278	0.654449		1.38718	0.107422
0.590057	0.435333		1.97159	0.491791			0.323639	0.11322		2.80975	0.181885
2.06223	1.3501		2.34894	0.497894			0.857544	0.535278		1.40701	0.437622
2.81372	0.621643		1.51474	0.514679			0.330963	0.172729		0.692444	0.27771
4.32144	0.845337		4.31763	0.495605			0.849304	0.369263		0.546875	0.240173
1.00555	0.71106		3.37341	0.519104			0.583801	0.42923		0.490417	0.059509
1.38092	0.773621		1.32126	0.635986			0.869293	0.461426		0.272827	0.378571
							0.782318	0.700684		0.280914	0.426636
T20	T20		T20	T20
0.671997	0.795593		2.27035	1.58051
1.33469	2.56714		3.94943	1.26358			T20	T20		T20	T20
0.623932	0.162659		1.79306	1.66855			0.30304	0.41687		1.30692	0.089264
2.86316	0.471039		1.34415	1.66305			0.34256	0.58609		1.52634	0.329285
3.51944	0.933075		1.77597	0.976868			0.15564	0.501709		1.54251	0.189209
1.08719	0.658417		0.992584	0.904846			0.502472	0.468445		0.361786	0.301971
0.626068	0.344238		1.30539	1.42914			1.25351	0.520172		0.960083	0.444641
2.2612	0.614166		2.6712	2.68784			0.510254	0.299683		0.225067	0.157623
1.2941	0.71991		0.465546	2.85828			0.280609	0.437317		1.20682	0.973358
0.379639	0.247345		2.52991	2.68967			0.853119	0.519257		0.149994	0.367432
							0.721741	0.513763		0.661774	0.322266
							0.18158	0.787201		0.863495	0.150146
T40	T40		T40	T40
1.75903	0.216675		1.33926	0.511475
0.801849	0.422516		0.982208	0.637207
0.764923	0.225677		0.596466	0.783081			T40	T40		T40	T40
0.666809	0.191193		0.697327	0.288849			0.993195	0.371704		0.545349	0.485992
0.200195	0.522308		0.867615	0.20752			1.1554	0.573883		0.437622	0.265961
3.25027	0.627441		0.589905	0.572357			0.396576	0.1651		0.203705	0.131989
3.56567	0.596924		0.711975	0.305481			1.1174	0.172882		0.082397	0.15976
0.375214	0.536957		0.472565	1.49307			0.477295	0.04364		0.623932	0.316925
1.22421	0.210266		0.413971	0.239868			0.045166	0.205841		0.642242	0.342255
1.08627	0.209808		0.25238	1.08963			0.39566	0.66803		0.039063	0.16449
							0.742188	0.463867		0.817413	0.272064
							0.285797	0.441132		0.588379	0.184937
							2.76077	0.412598		0.19516	0.127716

## Sheet: sub5
intracortical excitatory							intracortical inhibitory
motor imagery			motor execution				motor imagery			motor execution
APB	FDI		APB	FDI			APB	FDI		APB	FDI
Baseline	Baseline		Baseline	Baseline			Baseline	Baseline		Baseline	Baseline
0.965881	2.43805		0.465088	0.268402			1.08124	0.473022		0.012817	0.019531
1.41891	1.61743		1.87714	0.383301			0.901642	0.357208		0.027618	0.137329
0.708618	0.862274		1.29761	0.591583			0.859528	0.706024		0.489655	0.209656
0.909424	0.750732		2.21634	0.384064			0.414276	0.258636		0.118713	0.022888
1.12579	1.13724		0.63858	3.01849			0.326385	0.666199		0.180664	0.277863
1.2854	1.15021		2.27921	0.445099			0.727692	0.844421		0.020599	0.199585
1.7366	1.79321		0.872803	0.778961			0.289307	0.043793		0.057373	0.16037
0.963287	2.43866		0.959778	1.26434			1.1618	1.13678		0.0177	0.09964
1.04355	1.2468		0.263672	0.777893			1.64627	0.796814		0.072327	0.2948
0.949554	0.952606		1.21933	0.977783			0.647278	0.78186		0.01236	0.019531
T0	T0		T0	T0
1.34094	1.41266		2.94418	0.826569			T0	T0		T0	T0
1.09802	1.1351		2.85095	0.305786			0.546722	0.691986		1.45309	0.726013
1.06247	1.57181		1.51764	0.225983			0.470734	0.223541		4.17511	1.55487
0.62439	1.0231		3.74558	1.33026			1.66946	0.752411		0.488586	0.8815
2.22778	1.30539		0.85907	1.29913			2.30072	0.693054		0.273285	0.759735
1.74301	1.83838		1.95236	0.828094			1.19522	0.868225		4.44412	1.03348
1.38092	1.46225		3.50922	0.10025			1.64688	0.866852		1.41541	0.24231
1.16348	1.04492		3.6908	0.393372			0.571136	0.86792		0.257874	0.03891
0.993195	1.62155		4.29703	0.109558			1.12686	1.08948		1.42563	0.243378
0.918427	1.65329		1.42242	0.066376			0.157318	0.258331		1.96106	0.189362
							0.312653	1.04111		1.2677	0.84671
T20	T20		T20	T20
2.20917	2.14996		1.62888	0.834961
1.6214	1.78162		0.748901	0.884094			T20	T20		T20	T20
1.25351	1.50513		0.157471	1.10291			2.56897	1.47919		0.075378	0.813446
1.1319	1.13327		0.561981	1.40137			1.59592	1.05835		1.04935	0.716248
0.962982	1.70303		4.51736	1.6925			0.387573	0.093079		0.530396	0.346222
1.71692	1.79138		0.841522	1.79489			0.708771	0.455475		1.49536	0.72525
1.44058	1.5152		0.233459	0.802917			0.706635	0.417633		0.965729	0.977936
1.55136	1.10626		2.02438	1.52191			1.10321	0.978088		1.24451	0.307465
1.10565	1.33362		1.99966	1.29211			0.618744	0.167542		1.15707	0.59967
0.85434	0.846863		1.1264	1.41647			1.30371	0.497437		0.260468	0.20401
							1.16577	0.747223		1.63422	0.702209
							0.564423	0.914307		0.76416	0.695496
T40	T40		T40	T40
0.872498	1.25168		3.21976	1.29791
0.784149	1.12259		1.66626	0.886078
2.01599	2.00668		0.706635	0.433502			T40	T40		T40	T40
0.692139	0.811462		1.3002	1.75507			1.08002	1.51627		0.423889	0.977478
0.704803	0.990295		0.296783	0.297546			0.703583	1.2677		0.222015	0.133362
0.767365	1.23474		4.02451	0.896454				1.14426		1.15143	0.118866
1.01379	1.1879		1.32614	0.959625			0.70755	0.942841		0.05249	0.016937
1.30127	1.17935		3.78998	1.04492			1.00845	1.22574		0.725861	0.175934
1.01379	1.16776		3.5643	1.44333			0.994415	0.756836		1.95999	0.331726
1.49048	1.59943		2.77161	0.819244			1.23169	1.10016		0.019989	0.059357
							0.927887	0.799561		0.192261	0.272369
							1.61468	1.81534		1.52176	1.02905
							1.05194	0.801086		0.8638	0.789642

## Sheet: sub6
intracortical excitatory							intracortical inhibitory
motor imagery			motor execution				motor imagery			motor execution
APB	FDI		APB	FDI			APB	FDI		APB	FDI
Baseline	Baseline		Baseline	Baseline			Baseline	Baseline		Baseline	Baseline
1.22131	0.533295		1.10901	0.733795			0.692139	0.14801		1.58798	0.487976
0.285339	0.465546		1.31348	0.387878			0.914154	0.214539		0.997772	1.08917
0.316772	0.566101		1.4827	0.91156			0.404358	0.173035		0.423737	1.30997
1.39359	0.487671		1.51703	0.593414			0.062408	0.081177		0.3508	0.67749
1.32507	0.654755		0.919342	0.853119			0.101318	0.243988		0.658722	0.797424
1.30157	0.50705		1.51611	0.520782			0.139465	0.289459		0.93811	0.78186
1.60324	0.569763		1.34094	0.606689			0.180511	0.042877		0.378723	0.387115
0.56427	0.309296		0.102386	0.378113			0.514374	0.168152		0.053711	0.474548
2.46994	0.783691		1.90994	0.216522			0.121765	0.256653		0.166473	0.133209
0.708771	0.364532		0.604095	0.715637			0.220032	0.420837		0.641937	0.990143
T0	T0		T0	T0
0.646515	0.55954		1.60324	0.635681			T0	T0		T0	T0
0.768738	0.497437		4.37363	1.34964			0.071259	0.062408		0.546265	0.921326
0.879822	0.488739		3.0928	0.948944			1.58203	0.469208		1.36993	0.827484
1.81656	1.60568		2.06055	0.462189			1.16028	0.448914		1.74683	0.679779
2.13348	0.84671		4.30786	1.28845			0.997772	0.38269		0.659027	0.222473
0.748138	0.631866		0.475464	1.00723			1.51443	0.552216		1.09116	0.193176
0.392914	0.613861		2.55325	0.818329			0.536499	0.657043		0.579681	1.10001
1.31149	0.445557		0.743713	0.688477			1.86813	0.809937		0.736694	1.19873
0.070496	0.232849		2.05627	0.740662			1.55273	0.719299		1.05713	0.090179
3.09998	0.917969		1.51627	0.632477			0.09079	0.266571		0.132294	0.171509
1.06979	0.355225						0.198975	0.514526		0.762329	0.855408
1.24649	0.646973
1.18545	0.682678
0.317841	0.305939
0.802002	0.463562
							T20	T20		T20	T20
							0.038452	0.079956		0.480804	0.331421
							0.030365	0.029144		0.145721	0.380402
T20	T20		T20	T20			0.084229	0.243073		0.962677	0.388489
2.05231	0.744934		1.76117	0.949707			0.319214	0.448914		0.762177	0.124359
0.231171	0.300751		1.72989	1.09665			0.641022	0.100708		0.879517	0.248566
0.611572	0.497284		2.60223	0.88501			1.19278	0.119171		1.55624	0.564575
1.81274	0.688477		4.17313	2.06284			0.60379	0.171204		0.345306	0.766144
1.60324	0.560303		2.97531	1.10855			1.57272	0.240326		1.21582	1.65863
1.08612	0.592804		2.82455	0.884552			0.265808	0.342255		2.18964	0.678864
1.0582	0.964203		3.06961	0.651245			1.89301	0.351105		0.949402	0.292816
1.5184	0.828247		1.09543	0.653839						1.49734	1.03439
1.08749	0.379639		1.36826	0.948334						0.819092	0.780182
1.16943	0.405731		1.48041	0.765381						0.780182	0.779419
1.74988	0.349426
	0.301361						T40	T40		T40	T40
1.33224	1.00464						2.68112	0.487823		1.56998	0.733185
0.937958	0.158386						0.057831	0.26062		0.207062	0.825653
2.10007	0.580139						0.145111	0.202484		0.832672	1.38275
							0.042114	0.041656		0.157776	0.128937
							0.700226	0.566559		0.051422	0.112915
							0.185547	0.115814		0.014038	0.032501
T40	T40		T40	T40			0.367126			0.301208	0.293121
1.97006	0.588074		1.52725	1.22147			0.292206			0.641022	0.235901
2.54486	0.738983		4.1626	1.69601			0.709076			0.837402	0.110931
0.773773	0.610046		2.04193	1.41785			0.264587			1.45523	0.797577
0.733185	0.406342		2.73498	1.08398
1.40457	0.643311		3.20236	1.52084
1.47766	0.729065		1.31836	0.769196
1.98853	0.588837		0.674744	1.04309
0.322113	0.465088		6.37894	1.47232
2.47116	0.602417		1.58493	1.23734
0.505524	0.49118		0.508881	1.12579

## Sheet: sub7
intracortical excitatory							intracortical inhibitory
motor imagery			motor execution				motor imagery			motor execution
APB	FDI		APB	FDI			APB	FDI		APB	FDI
Baseline	Baseline		Baseline	Baseline			Baseline	Baseline		Baseline	Baseline
0.259094	0.662231		1.63452	2.60391			0.171661	0.759888		0.275116	0.772552
1.06918	0.350494		0.877991	0.871429			0.205078	0.689392		0.436401	0.253906
0.501251	0.703125		0.404053	2.29126			0.305939	0.394897		0.222931	0.313263
1.03805	0.697327		1.77445	2.22824			0.342102	0.545044		0.954132	0.410614
1.74118	0.735474		0.378265	2.38983			0.317383	0.496521		0.155487	0.75943
1.16623	0.759277		0.36911	1.48727			0.341949	0.540161		0.984955	1.51443
0.979462	1.33392		2.76993	2.35642			0.213776	0.243225		1.4743	0.265961
0.595398	0.558777		1.51	2.07275			0.236664	0.40802		0.424957	0.308838
0.948029	0.888519		1.27472	1.83075			0.726929	0.982513		0.067902	0.697174
2.57828	0.836182		0.164032	0.213776			1.20148	1.00006		0.191956	1.29486
T0	T0		T0	T0
0.717468	1.37512		1.24145	2.79571			T0	T0		T0	T0
0.557251	0.732269		0.559387	0.906677			0.664825	1.02646		0.013275	0.283508
0.831604	0.719452		2.77801	0.480804			0.239105	0.746307		1.15128	0.82016
2.29004	1.45035		0.519714	0.918732			0.269928	0.331268		0.095825	0.379639
0.706024	1.18378		0.774078	1.11542			0.928192	0.507355		0.042114	1.01456
0.778503	1.36566		6.08536	2.56195			0.591736	0.693512		1.45706	0.623474
0.840454	2.25342		0.167084	0.536499			0.423126	0.719604		0.017548	0.582886
2.99408	1.86249		1.05652	1.60111			0.498962	0.934296		0.726166	1.26068
0.937195	1.27808		1.16348	0.539551			0.631714	0.966339		1.53961	0.88913
1.04614	1.09009		4.60754	3.42789			2.67578	0.898743		0.039978	0.836487
1.05148	1.5387		0.321198	1.02325			1.22116	0.98526		2.06345	0.778809
2.17514	0.964813		0.807343	1.98181
0.866394	0.702515		2.90634	3.03528
1.06461	0.987091		1.2648	3.69583
0.568085	0.440674		1.36459	2.64526
							T20	T20		T20	T20
							0.312653	1.19507		0.822296	0.915375
							0.53009	0.863647		0.128021	0.83847
T20	T20		T20	T20			0.349884	0.805511		1.47598	1.1055
1.79916	1.75705		1.23535	1.77506			0.272827	0.904083		0.357208	1.35696
0.058899	0.184631		1.68747	0.725098			0.358734	0.875702		0.919952	1.72409
1.24405	0.98877		1.39618	3.23441						1.427	0.828247
0.639496	0.635376		0.882416	2.01324						0.409241	1.08124
1.16241	0.89386		1.77872	3.50418						0.933685	0.650177
0.624695	0.820313		3.97919	3.6412						0.715027	1.01883
0.721436	1.12167		2.33582	3.02506						0.2565	1.35712
0.870056	1.37329		2.99301	4.10782
2.20825	1.1586		1.15433	2.54745
1.50696	0.960693		2.74017	2.5264
1.43539	0.976105		1.33545	3.42224
2.88345	1.20926		1.72623	2.56271			T40	T40		T40	T40
2.38342	1.23978		1.21918	1.07178			1.28525	1.4888		0.913239	1.1058
2.46216	1.04309		1.49994	2.36069			0.409393	0.765839		0.023346	0.183258
1.46713	1.20422		2.50259	1.71387			0.022278	0.096283		0.35675	1.38855
0.818176	1.37878						0.393066	0.311584		0.03952	0.636292
0.301514	0.380402						0.391388	0.814667		0.068665	1.01471
1.88187	1.75308						1.09161	1.15799		1.3562	0.907135
3.19855	1.25397						1.13388	0.739899		0.115814	0.840607
							0.44632	1.88309		0.313568	0.56839
							0.64621	0.897217		0.240936	0.216064
							0.533447	1.13922		0.510254	0.777435
T40	T40		T40	T40
0.220795	0.348053		1.01593	2.7565
0.855255	2.08313		0.985107	2.87735
1.33789	0.904388		0.288849	1.4624
0.654297	0.954437		0.113831	0.738068
0.742645	0.52887		0.762787	0.435181
0.582733	0.487213		1.01257	0.511169
1.45096	0.673676		3.48648	0.791473
3.12714	0.567017		3.45551	2.06741
2.02042	1.30417		0.486908	1.05774
1.05682	0.259857		2.83646	2.97333
			1.51962	4.61258
			1.43433	3.96179
			0.589905	1.51749
			1.99524	1.1882
			0.696411	0.54245

## Sheet: sub8
intracortical excitatory							intracortical inhibitory
motor imagery			motor execution				motor imagery			motor execution
APB	FDI		APB	FDI			APB	FDI		APB	FDI
Baseline	Baseline		Baseline	Baseline			Baseline	Baseline		Baseline	Baseline
0.327606	1.20071		1.12732	1.98486			0.302734	1.59699		1.17172	0.046844
1.43616	1.05789		1.27564	0.59021			0.144653	0.55603		0.7724	0.102539
1.01059	1.14578		1.66962	0.431671			0.827484	0.277557		0.353851	0.131836
0.166779	0.61203		0.58548	0.260162			0.294647	0.375671		0.084991	0.067596
1.37176	1.03195		0.363922	0.261078			2.19635	1.19888		0.547791	0.114136
1.41052	1.52557		0.744171	0.439758			0.980682	0.686951		0.684509	0.322266
1.05514	0.837708		0.28183	0.174103			1.10184	0.887909		0.991516	0.523834
0.727386	1.11908		1.37909	0.337067			1.73386	0.835876		0.91095	0.170898
0.598907	0.869293		1.62476	0.634766			0.528564	0.388947		0.932922	0.111084
0.992279	1.01486		0.417328	0.295868			1.83487	0.851593		1.63757	0.15152
T0	T0		T0	T0
1.29272	1.24374		4.5694	0.384827			T0	T0		T0	T0
1.00876	1.93436		1.40671	0.359955			0.578308	1.82678		0.856171	0.742035
0.358124	0.842438		1.35452	0.307159			0.447693	1.63574		0.63736	0.204926
0.409851	1.00021		2.27127	0.381775			0.536957	0.460052		1.46469	0.053253
0.912628	1.16913		1.97159	0.359344			0.879364	1.14883		0.019531	0.032196
1.34994	2.00363		2.34894	0.490265			1.3385	1.11862		0.847931	1.27426
0.35202	0.510254		1.51474	0.428162			1.82846	1.74332		0.417328	0.502625
1.54236	1.71494		4.31763	0.553894			1.2352	0.816956		0.385132	0.144958
1.44882	1.05103		3.37341	0.312195			1.47965	0.52002		0.354004	0.338745
1.20529	0.91507		1.32126	0.329285			1.409	0.726166		0.279236	1.11618
							1.10947	0.559235		0.896912	0.700378
T20	T20		T20	T20
1.91482	2.26303		4.49539	1.40366
0.361176	0.841675		2.84164	0.867157			T20	T20		T20	T20
1.0202	1.36475		2.6976	1.15509			0.297241	1.30692		0.817413	0.039825
1.27945	1.12		1.77628	0.478058			0.268097	0.884705		0.681763	0.093079
1.22177	0.666656		2.11945	0.588074			0.575409	0.655518		0.626068	0.110626
0.728912	0.576782		0.908661	0.589447			0.574188	0.402527		1.79382	0.551147
1.23138	0.811462		1.65146	0.30304			0.691986	0.79071		1.06674	0.057526
0.77179	0.878296		4.06082	1.05331			0.541382	1.02844		0.088196	0.01297
0.3125	0.784607		7.48367	0.859222			1.54648	1.00891		0.74234	0.201263
0.960541	0.651093		4.52637	0.644073			0.566559	0.747375		2.61658	0.055237
2.43424	1.25503						1.84982	1.21796		0.393524	0.061646
1.41037	1.15723						0.476379	0.6987		0.411377	0.032196
0.87204	0.758057
1.24664	1.0434
1.57013	1.14929
							T40	T40		T40	T40
							1.12671	1.51184		0.850677	0.045929
T40	T40		T40	T40			0.49942	0.606689		0.790863	0.100708
2.00027	2.39807		2.06863	0.292053			0.184784	0.833588		1.45325	0.150757
0.951996	1.50955		1.96381	0.319824			0.83725	0.90744		0.516663	0.213013
1.53091	1.38428		5.38391	0.490723			0.434723	0.72937		0.686798	0.210724
0.957031	0.881195		1.02844	0.199127			0.261383	0.434723		0.473785	0.026703
0.644073	1.39557		4.13223	0.415039			1.12671	0.738678		0.966949	0.03006
0.282745	1.66168		0.697632	0.110474			1.28754	1.36108		1.27335	0.050049
0.695343	1.06201		0.505829	0.169678			0.882874	1.10977		0.119019	0.011292
1.07971	0.704041		0.744629	0.81665			0.219269	1.42715		0.335388	0.155029
1.49063	0.908051		0.56839	0.234375
0.506134	1.45386		3.83331	0.720673

## Sheet: sub9
intracortical excitatory							intracortical inhibitory
motor imagery			motor execution				motor imagery			motor execution
APB	FDI		APB	FDI			APB	FDI		APB	FDI
Baseline	Baseline		Baseline	Baseline			Baseline	Baseline		Baseline	Baseline
1.45386	0.297241		1.81915	3.09509			0.04776	0.171509		2.0665	2.61704
0.217438	0.379944		0.5159	2.67685			0.048828	0.140991		2.14966	0.862122
1.06186	1.11664		1.36475	2.70386			0.136871	0.438995		0.197144	0.267487
0.563507	0.558929		2.94632	2.81265			0.050201	0.223083		0.046234	0.044708
0.774078	1.14822		0.920715	2.59979			0.167389	0.771027		1.24023	0.322876
1.72882	1.25656		2.08801	0.161896			0.29541	2.94342		0.436096	0.197906
2.65854	1.2793		1.60004	1.93695			0.137787	0.841675		1.01578	0.414124
0.92041	1.32935		0.751495	0.744629			0.061035	0.50705		0.605621	1.99387
0.375671	1.28372		1.34781	0.970459			0.031128	0.09903		3.07526	1.54907
1.88827	2.01584		0.660706	0.851746			0.107422	0.730591		3.07724	1.14212
T0	T0		T0	T0
0.22644	0.709229		3.69553	3.42224			T0	T0		T0	T0
0.171051	1.48193		3.5817	3.15109			0.092926	0.357971		1.92322	1.51596
0.44632	0.655365		0.71228	1.73248			0.194092	0.305786		0.15213	1.18271
3.90488	4.98184		0.463867	1.69022			0.877228	0.32196		0.095978	0.30899
0.280457	3.66455		1.99036	3.33527			0.212708	0.315857		0.149841	1.52313
0.313568	1.60492		2.13715	3.47488			0.124207	0.174561		0.115967	0.941925
1.01837	1.47888		0.688629	0.834198			0.025482	0.056915		0.507965	0.220032
2.70691	0.92514		3.63617	3.87314			0.095215	0.147552		0.846863	2.70019
1.43112	0.180359		2.51892	2.69913			0.093079	0.747833		1.56876	0.933533
1.3533	1.24939		1.6777	1.90613			0.133667	0.328217		0.896759	0.216217
							0.800323	0.082245		2.62985	2.26944
T20	T20
0.645599	5.35172
0.575867	2.99835						T20	T20		T20	T20
1.38855	0.476379						0.754852	0.191956		1.2056	1.41159
1.24481	5.30472						0.513	0.443726		0.235596	2.42615
1.06476	4.58984		T20	T20			0.088959	0.090027		0.440063	0.325317
1.89163	4.01154		2.92633	3.927			0.037689	0.117645		0.175476	1.95511
1.30615	1.47018		2.34787	1.55823			0.140533	0.212097		0.375214	1.16898
2.18475	3.41141		0.142517	0.679932			0.319061	2.12647		1.54068	1.24252
1.87729	1.64948		2.13623	1.4859			1.67038	0.517426		1.30554	1.45752
1.95999	2.23175		1.24527	1.12183			0.222168	1.62933		1.96869	0.8815
1.4006	0.426331		0.392303	1.04446			0.225067	0.325928		0.314178	1.43463
			0.930023	0.538177			0.429688	1.58752		0.601044	0.294189
			0.262756	1.37909
			0.940094	1.3501
T40	T40		0.911255	2.13516
1.59805	0.263367
3.56827	1.19583						T40	T40		T40	T40
3.19611	0.5336						0.072937	0.189972		0.240021	2.19543
5.0267	0.740051						0.05127	0.218811		0.218964	3.07083
1.53854	3.69598						0.353394	2.22		0.176697	2.17804
1.83304	1.61346						2.17499	0.281677		0.108795	0.90271
1.74057	1.4534						0.040436	0.376434		0.209045	2.29111
2.58133	1.48041						1.50619	1.36063		0.380554	2.88452
0.238953	1.97098						0.10788	0.176392		1.57318	1.55777
0.1091	0.86853						0.360565	0.283356		0.643921	1.54984
							0.041656	0.231934		1.45966	1.56509
							0.296173	1.24497		0.762787	0.92865
			T40	T40
			1.80008	4.62936
			0.323639	1.94214
			1.53976	3.08929
			0.827637	1.36307
			0.243378	3.18527
			1.48224	3.49625
			0.795135	2.14264
			1.35101	2.60803
			0.881805	1.98822
			1.19873	0.914764

[truncated: 1 more sheets: sub10]
